# Supplementary material
Source: HighWire-hosted journal article supplement (https://nutrition.bmj.com/content/bmjnph-2021-000272)

Supplemental Table 1. Classification of food items in the food frequency questionnaire to food groups<sup>1</sup>

| Food groups                  | Items in the food frequency questionnaire                                                                                                                                                                                                                    |
|------------------------------|--------------------------------------------------------------------------------------------------------------------------------------------------------------------------------------------------------------------------------------------------------------|
| Total fruits                 | Citrus fruits such as orange, tangerine; other fruits, such as apple, pear, peach, banana; canned fruits (in syrup)                                                                                                                                          |
| Total vegetables             | Salad: lettuce, tomato, endive; green vegetables such as green beans, chard or spinach; other vegetables, such as eggplants, mushrooms                                                                                                                       |
| Potatoes                     | Baked, fried or boiled potatoes                                                                                                                                                                                                                              |
| Legumes                      | Lentils, chickpeas, beans                                                                                                                                                                                                                                    |
| Nuts                         | Nuts such as peanuts, hazelnuts, almonds                                                                                                                                                                                                                     |
| Refined grains               | Puffed breakfast cereals (“Corn flakes,” “Kellogg’s,” “Miel pops,” “Vitalis,” “Cheerios”), Snack bags (“chips,” “potato crisps,” “Cheetos,” “Fritos”); white rice, paella; pasta such as noodles, macaroni, spaghetti; white bread in sandwich or with meals |
| Dark or whole grain breads   | Dark or whole grain breads                                                                                                                                                                                                                                   |
| Sweets and desserts          | Chocolate: table, chocolates, “Kit Kat,” “Mars,” or “M&M’s”; treats such as jelly beans, candy; sweet cookies or crackers; cookies with chocolate, cream; cupcakes, sponge cake; chocolate or cream cakes; pastries, donuts, croissants                      |
| Eggs                         | Eggs                                                                                                                                                                                                                                                         |
| Dairy                        | Milk; yogurt/yoghurt; white or fresh cheese (Burgoes) or low-fat cheese; other cheeses such as cured or semi-cured, creamy; dairy desserts such as custard, flan, cottage cheese; ice creams                                                                 |
| Poultry                      | Chicken or turkey                                                                                                                                                                                                                                            |
| Red and processed meats      | Veal, pork, lamb such as steak, patty; minced meat, longaliza, hamburger; salty, sweet ham; sausages                                                                                                                                                         |
| Fish and seafood             | White fish such as hake, grouper; blue fish such as sardines, tuna, salmon; seafood such as mussels, prawns, squid                                                                                                                                           |
| Soups                        | Soups or cream-based soups                                                                                                                                                                                                                                   |
| Croquettes, dumplings, pizza | Croquettes, dumplings, pizza                                                                                                                                                                                                                                 |
| Sugar-sweetened beverages    | Sugary drinks such as “Coca-Cola,” “Fanta”; low calorie drinks such as diet coke, coca-cola light                                                                                                                                                            |
| Fruit juices                 | Commercial fruit juices                                                                                                                                                                                                                                      |
| Vegetable oil                | Vegetable oil such as olive oil, corn, canola, or rapeseed oil                                                                                                                                                                                               |
| Butter                       | Butter                                                                                                                                                                                                                                                       |
| Alcohol                      | Wine, sangria; beer (not including alcohol-free beer); distilled beverages such as whiskey, gin, cognac                                                                                                                                                      |
| Coffee                       | Coffee                                                                                                                                                                                                                                                       |
| Tea                          | Black or green tea                                                                                                                                                                                                                                           |

<sup>1</sup> We used the food frequency questionnaire published in Rodríguez IT, Ballart JF, Pastor GC, Jordà EB, Val VA. [Validation of a short questionnaire on frequency of dietary intake: reproducibility and validity]. *Nutr Hosp*. 2008;**23**:242-252.

Supplemental Table 2. Dietary intake of health care workers stratified by self-report of following low carbohydrate, high protein diet among Covid-19 cases (N=568)<sup>a</sup>

|                                       | Followed low carbohydrate, high protein diet (n=91) | Did not follow low carbohydrate, high protein diet (n=477) | P-value          |
|---------------------------------------|-----------------------------------------------------|------------------------------------------------------------|------------------|
| Dietary intake, times/week (Mean, SD) |                                                     |                                                            |                  |
| Total fruits                          | 8.2 (5.7)                                           | 8.7 (6.7)                                                  | 0.59             |
| Total vegetables                      | 11.7 (8.9)                                          | 10.5 (7.0)                                                 | 0.16             |
| Potatoes                              | 2.2 (2.4)                                           | 2.1 (1.6)                                                  | 0.68             |
| <b>Legumes</b>                        | <b>2.4 (2.4)</b>                                    | <b>1.9 (1.7)</b>                                           | <b>0.02</b>      |
| <b>Nuts</b>                           | <b>3.1 (4.6)</b>                                    | <b>2.3 (2.5)</b>                                           | <b>0.01</b>      |
| <b>Refined grains</b>                 | <b>6.8 (5.6)</b>                                    | <b>8.9 (5.1)</b>                                           | <b>&lt;0.001</b> |
| Dark or whole grain breads            | 2.1 (2.2)                                           | 2.3 (2.5)                                                  | 0.67             |
| <b>Sweets and desserts</b>            | <b>5.2 (6.4)</b>                                    | <b>7.0 (6.8)</b>                                           | <b>0.02</b>      |
| <b>Eggs</b>                           | <b>3.0 (2.6)</b>                                    | <b>2.1 (1.7)</b>                                           | <b>&lt;0.001</b> |
| Dairy                                 | 12.0 (9.7)                                          | 13.5 (7.6)                                                 | 0.09             |
| <b>Poultry</b>                        | <b>2.7 (2.0)</b>                                    | <b>2.2 (1.6)</b>                                           | <b>0.008</b>     |
| Red and processed meats               | 3.4 (3.1)                                           | 3.7 (2.8)                                                  | 0.39             |
| Fish and seafood                      | 3.3 (3.0)                                           | 3.0 (2.6)                                                  | 0.34             |
| <b>Soups</b>                          | <b>1.7 (1.7)</b>                                    | <b>1.3 (1.4)</b>                                           | <b>0.04</b>      |
| <b>Croquettes, dumplings, pizza</b>   | <b>0.8 (0.9)</b>                                    | <b>1.0 (1.0)</b>                                           | <b>0.01</b>      |
| Sugar-sweetened beverages             | 2.6 (4.0)                                           | 2.3 (3.2)                                                  | 0.43             |
| Fruit juices                          | 0.9 (1.4)                                           | 0.9 (1.9)                                                  | 0.92             |
| <b>Vegetable oil</b>                  | <b>3.0 (2.7)</b>                                    | <b>3.9 (3.3)</b>                                           | <b>0.011</b>     |
| Butter                                | 1.7 (2.0)                                           | 1.9 (2.4)                                                  | 0.43             |
| Alcohol                               | 3.5 (4.6)                                           | 3.6 (4.2)                                                  | 0.75             |
| Coffee                                | 7.1 (6.8)                                           | 7.7 (6.6)                                                  | 0.38             |
| Tea                                   | 2.5 (3.5)                                           | 2.0 (3.6)                                                  | 0.23             |

<sup>a</sup> Cases are defined as individuals with self-reported Covid-19-like illness (fever, coughing, fatigue, loss of taste or smell) or a positive PCR or antibody test. P-value comparing those following a low carbohydrate, high protein diet vs. those not following a low carbohydrate, high protein diet. Details on these food groups are presented in **Supplemental Table 1**.

Bold font denotes statistically significant associations.

Supplemental Table 3. Adjusted Odds ratios (OR) and 95% confidence intervals (CI) for the association between self-reported diets and odds of Covid-19 (N=2884)<sup>a</sup>

|                                        | OR (95% CI)          |         |                      |         |                      |         |
|----------------------------------------|----------------------|---------|----------------------|---------|----------------------|---------|
|                                        | Model 1 <sup>b</sup> | P-value | Model 2 <sup>c</sup> | P-value | Model 3 <sup>d</sup> | P-value |
| Plant-based diets                      | 0.79 (0.56, 1.14)    | 0.21    | 0.80 (0.56, 1.14)    | 0.21    | 0.81 (0.56, 1.15)    | 0.24    |
| Plant-based diets or pescatarian diets | 0.76 (0.54, 1.07)    | 0.11    | 0.76 (0.55, 1.07)    | 0.12    | 0.77 (0.55, 1.08)    | 0.14    |
| Low carbohydrate, high protein diets   | 1.01 (0.78, 1.31)    | 0.94    | 1.01 (0.78, 1.31)    | 0.92    | 1.00 (0.78, 1.30)    | 0.98    |

<sup>a</sup> Cases are defined as individuals with self-reported Covid-19-like illness (fever, coughing, fatigue, loss of taste or smell) or a positive PCR or antibody test.

<sup>b</sup> Model 1 adjusted for age, sex, race/ethnicity, and country.

<sup>c</sup> Model 2 additionally adjusted for specialty, smoking, and physical activity

<sup>d</sup> Model 3 additionally adjusted for body mass index and presence of a medical condition

Supplemental Table 4. Adjusted Odds ratios (OR) and 95% confidence intervals (CI) for the association between self-reported diets and duration of Covid-19 among Covid-19 cases (N=568)<sup>a</sup>

|                                        | OR (95% CI)          |         |                      |         |                      |         |
|----------------------------------------|----------------------|---------|----------------------|---------|----------------------|---------|
|                                        | Model 1 <sup>b</sup> | P-value | Model 2 <sup>c</sup> | P-value | Model 3 <sup>d</sup> | P-value |
| Plant-based diets                      | 1.19 (0.53, 2.66)    | 0.67    | 1.21 (0.54, 2.71)    | 0.64    | 1.25 (0.56, 2.82)    | 0.58    |
| Plant-based diets or pescatarian diets | 1.15 (0.54, 2.48)    | 0.71    | 1.17 (0.54, 2.52)    | 0.69    | 1.21 (0.56, 2.62)    | 0.63    |
| Low carbohydrate, high protein diets   | 1.22 (0.68, 2.19)    | 0.51    | 1.19 (0.66, 2.15)    | 0.57    | 1.17 (0.65, 2.13)    | 0.56    |

<sup>a</sup> Cases are defined as individuals with self-reported Covid-19-like illness (fever, coughing, fatigue, loss of taste or smell) or a positive PCR or antibody test. We compared >14 days vs. ≤14 days. Participants reported the number of days they experienced symptoms of Covid-19. Asymptomatic individuals with a positive PCR or antibody test were considered to have 0 days of Covid-19 symptom duration.

<sup>b</sup> Model 1 adjusted for age, sex, race/ethnicity, and country.

<sup>c</sup> Model 2 additionally adjusted for specialty, smoking, and physical activity

<sup>d</sup> Model 3 additionally adjusted for body mass index and presence of a medical condition

Supplemental Table 5. Adjusted Odds ratios (OR) and 95% confidence intervals (CI) for the association between self-reported diets and odds of Covid-19-positive test (by PCR or antibody), severity, and duration of Covid-19<sup>a</sup>

|                                                          | OR (95% CI)              |             |                          |             |                          |             |
|----------------------------------------------------------|--------------------------|-------------|--------------------------|-------------|--------------------------|-------------|
|                                                          | Model 1 <sup>b</sup>     | P-value     | Model 2 <sup>c</sup>     | P-value     | Model 3 <sup>d</sup>     | P-value     |
| <b>Covid-19 test</b>                                     |                          |             |                          |             |                          |             |
| Plant-based diets                                        | 0.62 (0.36, 1.05)        | 0.08        | 0.62 (0.37, 1.07)        | 0.09        | 0.62 (0.37, 1.07)        | 0.09        |
| Plant-based diets or pescatarian diets                   | <b>0.55 (0.33, 0.93)</b> | <b>0.02</b> | <b>0.56 (0.34, 0.95)</b> | <b>0.03</b> | <b>0.57 (0.34, 0.95)</b> | <b>0.03</b> |
| Low carbohydrate, high protein diets                     | 0.89 (0.62, 1.27)        | 0.51        | 0.90 (0.63, 1.29)        | 0.56        | 0.90 (0.63, 1.28)        | 0.56        |
| <b>Moderate-to-severe vs. mild to very mild severity</b> |                          |             |                          |             |                          |             |
| Plant-based diets                                        | 0.50 (0.13, 1.90)        | 0.31        | 0.49 (0.13, 1.86)        | 0.29        | 0.48 (0.13, 1.86)        | 0.29        |
| Plant-based diets or pescatarian diets                   | 0.48 (0.13, 1.81)        | 0.28        | 0.47 (0.12, 1.78)        | 0.26        | 0.46 (0.12, 1.77)        | 0.26        |
| Low carbohydrate, high protein diets                     | 1.29 (0.61, 2.72)        | 0.51        | 1.31 (0.62, 2.76)        | 0.48        | 1.31 (0.62, 2.77)        | 0.48        |
| <b>&gt;14 days vs. ≤14 days of Covid-19 symptoms</b>     |                          |             |                          |             |                          |             |
| Plant-based diets                                        | 0.74 (0.19, 2.84)        | 0.66        | 0.70 (0.18, 2.77)        | 0.62        | 0.70 (0.18, 2.74)        | 0.61        |
| Plant-based diets or pescatarian diets                   | 0.66 (0.17, 2.53)        | 0.55        | 0.64 (0.17, 2.47)        | 0.52        | 0.65 (0.17, 2.50)        | 0.53        |
| Low carbohydrate, high protein diets                     | 1.85 (0.82, 4.16)        | 0.14        | 1.86 (0.82, 4.22)        | 0.14        | 1.82 (0.80, 4.14)        | 0.15        |

<sup>a</sup> Cases are defined as individuals a positive PCR or antibody test (N=298 cases and N=2316 controls). Cases were asked to rate the severity of Covid-19 illness. We compared moderate-to-severe severity (N=87) to very mild to mild severity (N=211). Severity was defined as: 1) Very mild: asymptomatic or nearly asymptomatic, 2) Mild: symptoms [fever <38°C (without treatment), with or without cough, no dyspnea, no gasping, no abnormal imaging findings], 3) Moderate: [fever, respiratory symptoms, and/or imaging findings of pneumonia], 4) Severe: meet any of the following: 1) respiratory distress, respiratory rate ≥30 times/min 2) low oxygen saturation <93% at rest 3) partial pressure of oxygen (PaO<sub>2</sub>)/ fraction of inspired oxygen (FiO<sub>2</sub>) ≤ 300 mm Hg. Cases also reported the number of days they experienced symptoms of Covid-19. We compared >14 days (N=73) to ≤14 days of Covid-19 symptoms (N=225).

<sup>b</sup> Model 1 adjusted for age, sex, race/ethnicity, and country.

<sup>c</sup> Model 2 additionally adjusted for specialty, smoking, and physical activity

<sup>d</sup> Model 3 additionally adjusted for body mass index and presence of a medical condition

Bold font denotes statistically significant associations.

Supplemental Figure 1. Flow diagram of study participants

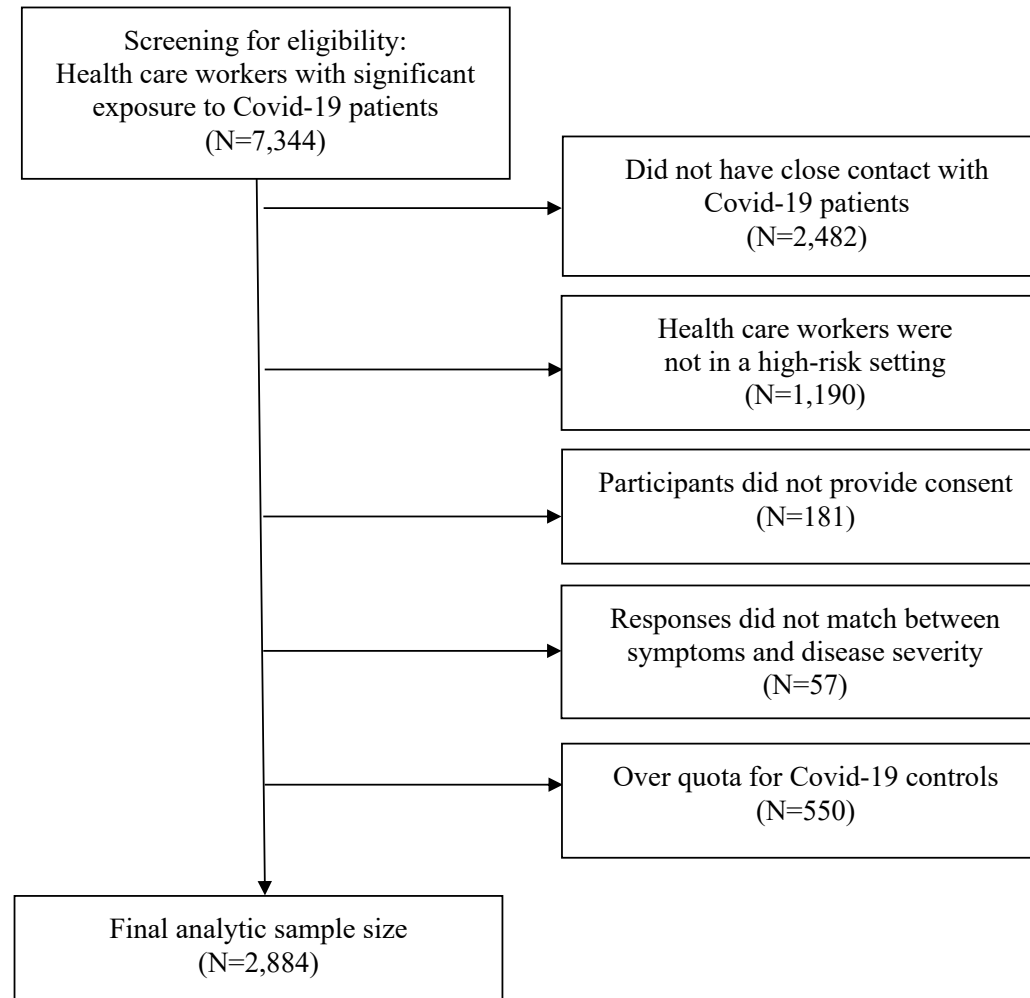

Supplement: inline-supplementary-material-1 [file inline-supplementary-material-1.pdf]
